# Supplementary material
Source: publisher figshare collection journal article supplement (https://tandf.figshare.com/articles/dataset/_/5297674)
Supplement: Supplementary file 1 [file 1]

# Stochastic Multiattribute Acceptability Analysis: an application to the ranking of Italian regions

## APPENDIX A

## A.1 Multidimensional polarisation indices

The multidimensional Gini index has been developed as follows. We build upon the polarisation index proposed by Esteban and Ray (1994) corrected as proposed by Esteban *et al.* (2007). More precisely, with respect to the upward cumulative rank acceptability index  $b_{\succeq l}^k$ ,  $l=1,\dots,n-1$ , we computed the mean value  $b_{\succeq l}^M$  of the upward cumulative rank acceptability indices  $b_{\succeq l}^k$ ,  $k=1,\dots,n$ , that is

$$b_{\succeq l}^M = \frac{\sum_{k=1}^n P_k b_{\succeq l}^k}{\sum_{k=1}^n P_k}, \quad \text{eq. (A1)}$$

With  $P_k$ , being the population of the  $k$ -th region,  $k=1,\dots,n$ . After we calculated the normalized upward cumulative rank acceptability indices  $\tilde{b}_{\succeq l}^k$ , that is

$$\tilde{b}_{\succeq l}^k = \frac{b_{\succeq l}^k}{b_{\succeq l}^M}. \quad \text{eq. (A2)}$$

On the basis of values  $\tilde{b}_{\succeq l}^k$ , we defined the cumulative distribution  $F^{\succeq l} : [0,1] \rightarrow [0,1]$  such that for all  $x \in [0,1]$

$$F^{\succeq l}(x) = \frac{\sum_{k: \tilde{b}_{\succeq l}^k \geq x} P_k}{\sum_{k=1}^n P_k}. \quad \text{eq. (A3)}$$

Following the methodology proposed by Aghevli and Mehran (1981) and Davies and Shorrocks (1989), we found also an optimal partition  $\rho^{\succeq l}$  of the distribution  $F^{\succeq l}$  in  $r$  groups minimise the Gini index value of within-group inequality,  $r \leq n$ , that is

$$\rho^{\underline{l}} = (z_0^{\underline{l}}, z_1^{\underline{l}}, \dots, z_{r-1}^{\underline{l}} \leq z_r^{\underline{l}} = 1; y_1^{\underline{l}}, \dots, y_r^{\underline{l}}; p_1^{\underline{l}}, \dots, p_r^{\underline{l}}) \quad \text{eq. (A4)}$$

with  $0 = z_0^{\underline{l}} \leq z_1^{\underline{l}} \leq \dots \leq z_{r-1}^{\underline{l}} \leq z_r^{\underline{l}} = 1$  and  $y_1^{\underline{l}}$  and  $p_1^{\underline{l}}$  being the average value of the normalized cumulative rank acceptability indices  $\tilde{b}_{\underline{l}}^k$  and the population shares in the interval  $[z_{i-1}^{\underline{l}}, z_i^{\underline{l}}]$  of  $\tilde{b}_{\underline{l}}^k$  values.

Finally we computed the polarization index  $EGR^{\underline{l}}$  as follows:

$$EGR^{\underline{l}}(F, \alpha, \beta, \rho^{\underline{l}}) = \sum_{i=1}^r \sum_{j=1}^r \left( p_i^{\underline{l}} \right)^{1+\alpha} p_j^{\underline{l}} \left| y_i^{\underline{l}} - y_j^{\underline{l}} \right| - \beta \left[ G(F) - G(\rho^{\underline{l}}) \right] \quad \text{eq. (A5)}$$

with  $\alpha \in [1, 1.16]$  is the sensitivity to polarization and  $\beta \geq 0$ . In our application to the study of Italian regions we considered 2 groups in the partition  $\rho^{\underline{l}}$ ,  $\alpha=1$  and  $\beta=1$ . Analogous polarization indices  $EGR^{\underline{l}}$ ,  $l=1, \dots, n-1$ , can be defined with respect to the downward cumulative rank acceptability index  $b_{\underline{l}}^k$ .

## A.2 Data and normalisation procedure

Table A.1 reports variables description along with summary statistics. Please note also that the last column of Table A.1 reports the categorization of each variable according the good/bad nature of the considered criteria.

Taking inspiration from Mazziotta and Pareto (2016), to make comparable variables expressed on different metric we normalised them according to the following formula

that assigns to each value  $x$  on a “good criterion”, that is a criterion with a preference increasing with respect to the assigned value (e.g. gross domestic product), the normalized value

$$\bar{x} = \begin{cases} 0 & \text{if } z \leq -3 \\ \frac{z+3}{6} & -3 < z < 3 \\ 1 & z \geq 3 \end{cases} \quad \text{eq. (A6)}$$

where  $z$  is the z-score

$$z = \frac{x - M}{\sigma} \quad \text{eq. (A7)}$$

with  $M$  and  $\sigma$  being the mean and the standard deviation of the considered criterion, respectively, so that

$$\bar{x} = \begin{cases} 0 & \text{if } x \leq M - 3\sigma \\ \frac{x - M + 3\sigma}{6\sigma} = 0.5 + \frac{z}{6} & \text{if } M - 3\sigma < x < M + 3\sigma \\ 1 & \text{if } x \geq M + 3\sigma \end{cases} \quad \text{eq. (A8)}$$

In case of a “bad criterion”, that is a criterion with a preference decreasing with respect to the assigned value (e.g. the social exclusion), the normalized value  $\bar{x}$  of  $x$  is given by

eq. (A9)

$$\bar{x} = \begin{cases} 1 & \text{if } z \leq -3 \\ \frac{3-z}{6} & -3 < z < 3 \\ 0 & z \geq 3 \end{cases}$$

that is,

$$\bar{x} = \begin{cases} 1 & \text{if } x \leq M - 3\sigma \\ \frac{M - x + 3\sigma}{6\sigma} = 0.5 - \frac{z}{6} & \text{if } M - 3\sigma < x < M + 3\sigma \\ 0 & \text{if } x \geq M + 3\sigma \end{cases} \quad \text{eq. (A10)}$$

The idea is to consider as extreme of the normalization scales the values  $M-3\sigma$  and  $M+3\sigma$  within which lie 99,73% of values in case of normal distribution and, by the Chebyshev's inequality, 89% of values for any distribution for which an average and standard deviation are defined.

For illustrative purposes, we begin with the evaluation according to the usual arithmetic mean (equal weights) of the performances normalized on the interval having as extreme the minimum and the maximum evaluations, that is

$$\tilde{x}_l = \frac{x_l - x_{min}}{x_{max} - x_{min}}; \quad \text{eq. (A11)}$$

in case of a “good criterion”, or

$$\tilde{x}_l = \frac{x_{max} - x_l}{x_{max} - x_{min}} \quad \text{eq. (A12)}$$

in case of a “bad criterion”.

### A.3 Robustness checks

#### *Stability of central weights.*

We have tested the stability of the central weight vectors for the four regions for which is not null the probability to be the most preferred by computing the relative confidence factor. We proceeded as follows. We generated perturbed evaluations on considered criteria for all the regions by extracting random values in the interval

$$[g_i(a) - 0.25\sigma_i, g_i(a) + 0.25\sigma_i]$$

for the evaluations of each region  $a$  on considered criteria  $g_i$ , where  $\sigma_i$  is the standard deviation of the criterion  $g_i$ ,  $i=1, \dots, 65$ . Taking the central weight vector of the region  $a^*$  for which we test the stability of the weight vector giving it the best position, we computed the new ranking corresponding to the perturbed evaluations. We repeated this procedure 1,000,000 times and we got an estimation that the region  $a^*$  remains the best. This probability is 100% for Trentino Alto Adige, 87.2% for Toscana, 84.5% for Emilia Romagna and 80% for Friuli-Venezia Giulia.

#### *Measurement error.*

To test the robustness to measurement error we have taken in consideration perturbations in the values assigned to each region by the 65 variables of the BES dataset. More precisely, we considered an interval of variation

$$[g_i(a)-k\sigma_i, g_i(a)+k\sigma_i]$$

for the evaluations of each region  $a$  on considered criteria  $g_i$ , where  $\sigma_i$  is the standard deviation of the criterion  $g_i$ ,  $i=1, \dots, 65$  and  $k \geq 0$ . The case  $k=0$  corresponds to the absence of any perturbation. We further considered the case  $k=0.25$ ,  $k=0.5$  and  $k=1$ . In each one of these case and in each one of 1,000,000 of iterations we randomly extracted not only a vector of weights for the 65 criteria, but also a perturbed evaluation  $\tilde{g}_i(a)$  in the considered range for each region  $a$  on each criterion  $g_i$ ,  $i=1, \dots, 65$ . On the basis of the perturbed values, for each one of the 65 criteria considered by BES, we computed the “perturbed mean” and the “perturbed standard deviation” and we normalized according to equations (8) and (9) the perturbed evaluations  $\tilde{g}_i(a)$ . The RF and the PWI corresponding to  $k=0.25$  are shown in Table A.3 and Table A.4, respectively. The analogous tables for  $k=0.5$  and  $k=1$  can be found in the electronic appendix.

In order to assess the consistency and reliability of the resulting ranking, the Intraclass Correlation Coefficient (ICC) has been computed considering the above  $k=0.25$ ,  $0.5$ , and  $1$  as resulting from alternative evaluation exercises performed by 3 additional raters with respect to

the actual measurement released by the Italian National Institute of Statistics. To this end, the consistency-of-agreement ICC (CA-ICC) has been used. The rationale for adopting the CA-ICC is that different measurements are considered consistent if the scores from any two measurements (or *raters*) give the same ranking to all the regions (Shrout and Fleiss, 1979; McGraw and Wong, 1996a, 1996b). The results reported in Table A.4 show that our ranking exercise is robust to the substantial differences in measurement here hypothesised. Indeed, both the individual and the average coefficients are in no occasion<sup>1</sup> lower than 0.60 with 15 out of the 20 ranking here considered showing a ICC higher than 0.80.

## References

Aghevli, B. B., & Mehran, F. (1981). Optimal grouping of income distribution data. *Journal of the American Statistical Association*, 76(373), 22-26.

Davies, J. B., & Shorrocks, A. F. (1989). Optimal grouping of income and wealth data. *Journal of econometrics*, 42(1), 97-108.

Esteban, J-M., Gradìn, C., & Ray, D. (2007). Extension of a measure of polarization with an application to the income distributions of five OECD countries. *Journal of Income Inequality*, 5, 1-19.

Esteban, J.M., & Ray, D. (1994). On the measurement of polarization. *Econometrica*, 62, 819-851.

Mazziotta, M., & Pareto, A. (2016). On a Generalized Non-compensatory Composite Index for Measuring Socio-economic Phenomena. *Social indicators research*, 127, 983

---

<sup>1</sup> All the ICC are statistically significant according to related F-test.

McGraw, K. O., & Wong S. P. (1996a). Forming inferences about some intraclass correlation coefficients. *Psychological Methods, 1*, 30–46.

McGraw, K. O., & Wong S. P. (1996b). Forming inferences about some intraclass correlation coefficients: Correction. *Psychological Methods, 1*, 309.

Shrout, P. E., & Fleiss, J. L. (1979). Intraclass correlations: Uses in assessing rater reliability. *Psychological Bulletin, 86*, 420–428.



## APPENDIX TABLES

Table A1 - Variables description and descriptive statistics

| Variable           | Description                                                                                            | Categorisation | Mean   | Std. Dev. | Min  | Max  |
|--------------------|--------------------------------------------------------------------------------------------------------|----------------|--------|-----------|------|------|
| Health             |                                                                                                        |                |        |           |      |      |
| HEALTH1            | Life expectancy without limitations in activities at age 65                                            | Good           | 44.69  | 4.532909  | 38.6 | 52.6 |
| HEALTH2            | Rate of mortality from dementia and diseases of the nervous system                                     | Bad            | 19.795 | 1.616519  | 16.5 | 22.3 |
| HEALTH3            | People aged 14 and older who have at least one risk behaviour in alcohol consumption                   | Bad            | 16.83  | 3.635946  | 10.7 | 24.3 |
| HEALTH4            | People aged 14 and over who do not practice any physical activity                                      | Bad            | 39.135 | 11.79966  | 17.6 | 60.4 |
| HEALTH5            | People aged 3 years and older who consume at least 4 daily servings of fruits and / or vegetables      | Good           | 17.62  | 5.246713  | 6.2  | 28.3 |
| Education          |                                                                                                        |                |        |           |      |      |
| EDU1               | People 25-64 who have completed at least the secondary school                                          | Good           | 59.565 | 6.690155  | 47.2 | 70.1 |
| EDU2               | People aged 30-34 who have completed a university degree                                               | Good           | 24.2   | 4.166533  | 17.4 | 31.6 |
| EDU3               | Graduates who enrol for the first time at the university in the same year in which they graduated      | Good           | 13.995 | 4.328665  | 8.4  | 24   |
| EDU4               | People 15-29 years neither in education, employment or training (Neet)                                 | Bad            | 25.115 | 7.691915  | 14.3 | 40.3 |
| EDU5               | People aged 25-64 who participated in education and training in the 4 weeks preceding the interview    | Good           | 8.275  | 1.695776  | 5.1  | 12   |
| EDU6               | People aged 6 and over who have practiced three or more cultural activities in the preceding 12 months | Good           | 26.295 | 7.74627   | 14.8 | 42.1 |
| Working Conditions |                                                                                                        |                |        |           |      |      |
| WORK1              | Employment rate of the population aged 20-64 years                                                     | Good           | 60.08  | 10.70015  | 42.4 | 73.6 |
| WORK2              | Rate of non-participation in the work of the population aged 15-74 years                               | Good           | 22.92  | 11.26805  | 9    | 42.7 |
| WORK3              | Fixed-term employees and employees who started their current job for at least five years               | Good           | 20.205 | 7.301008  | 10.1 | 38   |

| Variable         | Description                                                                                                                                                                       | Categorisation | Mean    | Std. Dev. | Min   | Max   |
|------------------|-----------------------------------------------------------------------------------------------------------------------------------------------------------------------------------|----------------|---------|-----------|-------|-------|
| WORK4            | Rate of low-pay employees                                                                                                                                                         | Bad            | 11.28   | 4.651497  | 6.8   | 22.4  |
| WORK5            | Rate of overeducated employees                                                                                                                                                    | Bad            | 23.16   | 2.860327  | 17.6  | 29.4  |
| WORK6            | Employment rate of women aged 25-49 with at least one child aged 6-14 over total number of women                                                                                  | Good           | 81.13   | 6.629844  | 67.3  | 92    |
| WORK7            | Work satisfaction                                                                                                                                                                 | Good           | 7.245   | 0.213923  | 6.9   | 7.7   |
| WORK8            | Employment insecurity perception                                                                                                                                                  | Good           | 10.74   | 2.627466  | 5.9   | 17    |
| WORK9            | Share of involuntary part-time to total employment by gender                                                                                                                      | Bad            | 11.845  | 2.518244  | 7     | 16.7  |
| Economic Welfare |                                                                                                                                                                                   |                |         |           |       |       |
| ECONW1           | Average disposable income of households                                                                                                                                           | Good           | 17223.9 | 3245.781  | 12343 | 21286 |
| ECONW2           | Index of inequality in disposable income                                                                                                                                          | Bad            | 5.16    | 1.302386  | 3.6   | 8.9   |
| ECONW3           | People at risk of poverty                                                                                                                                                         | Bad            | 19.36   | 10.29913  | 7.7   | 40.1  |
| ECONW4           | People living in households with severe material deprivation                                                                                                                      | Bad            | 10.96   | 6.194684  | 3.1   | 26    |
| ECONW5           | People living in overcrowding situations, in dwellings without some services and with structural problems                                                                         | Bad            | 9.44    | 2.845569  | 5.5   | 15.7  |
| ECONW6           | People under 60 years living in households with very low work intensity                                                                                                           | Bad            | 12.09   | 6.605811  | 4.6   | 25    |
| ECONW7           | Subjective evaluation index of economic difficulty                                                                                                                                | Bad            | 16.61   | 9.040896  | 4.6   | 38.4  |
| Social Capital   |                                                                                                                                                                                   |                |         |           |       |       |
| SOC1             | People aged 14 and over who declare themselves very satisfied of family relationships                                                                                             | Good           | 33.73   | 6.012452  | 20.9  | 46.3  |
| SOC2             | People aged 14 and over who declare themselves very satisfied with the friendly relations                                                                                         | Good           | 24.02   | 4.593657  | 15.4  | 35.3  |
| SOC3             | People aged 14 and over who have relatives, friends or neighbours you can count on                                                                                                | Good           | 81.88   | 3.134461  | 74.5  | 88    |
| SOC4             | People aged 14 and over who during the last 12 months they have played at least one social participation activities                                                               | Good           | 24.015  | 5.632825  | 14.9  | 40    |
| SOC5             | People aged 14 and over who talk about politics or that you inform policy at least once a week, who participated in online consultations or vote on social or political issues or | Good           | 66.915  | 7.447166  | 53.7  | 75.7  |

| Variable | Description                                                                                                                                                                                                              | Categorisation | Mean   | Std. Dev. | Min  | Max  |
|----------|--------------------------------------------------------------------------------------------------------------------------------------------------------------------------------------------------------------------------|----------------|--------|-----------|------|------|
| SOC6     | have read and posted opinions on social and political problems on the web in recent 3 months<br>People aged 14 and over who during the last 12 months have carried out unpaid work for organizations or volunteer groups | Good           | 10.255 | 3.782296  | 5    | 21.9 |
| SOC7     | People aged 14 and over who during the last 12 months have funded associations                                                                                                                                           | Good           | 14.91  | 5.775802  | 5.7  | 28.8 |
| SOC8     | People aged 14 and over who trust others                                                                                                                                                                                 | Good           | 23.1   | 4.450429  | 17.3 | 33.6 |
| Politics |                                                                                                                                                                                                                          |                |        |           |      |      |
| POL1     | People aged 18 and over who have voted in the European Parliament elections                                                                                                                                              | Good           | 57.46  | 9.097912  | 42   | 70.5 |
| POL2     | People aged 14 and over who express confidence in the Italian Parliament                                                                                                                                                 | Good           | 3.41   | 0.305907  | 2.8  | 4    |
| POL3     | People aged 14 and over who express confidence in the judicial system                                                                                                                                                    | Good           | 4.215  | 0.297843  | 3.4  | 4.8  |
| POL4     | People aged 14 and over who express confidence in parties                                                                                                                                                                | Good           | 2.355  | 0.230503  | 1.9  | 2.8  |
| POL5     | People aged 14 and over who express confidence in the regional government, the provincial government or in their own town                                                                                                | Good           | 3.72   | 0.503253  | 2.9  | 4.9  |
| POL6     | People aged 14 and over who express confidence in the police and fire brigade                                                                                                                                            | Good           | 7.055  | 0.24165   | 6.6  | 7.5  |
| POL7     | Average age of MPs - XVII Legislature - January 2014                                                                                                                                                                     | Bad            | 49.925 | 1.560322  | 45.9 | 52.5 |
| Safety   |                                                                                                                                                                                                                          |                |        |           |      |      |
| SFTY1    | Rate of theft in dwelling                                                                                                                                                                                                | Bad            | 16.125 | 6.641724  | 4.9  | 31.9 |
| SFTY2    | Rate of pickpocketing                                                                                                                                                                                                    | Bad            | 5.96   | 4.291289  | 0.9  | 16.5 |
| SFTY3    | Rate of robbery                                                                                                                                                                                                          | Bad            | 1.56   | 1.132487  | 0.1  | 4.6  |
| SFTY4    | Women 16-70 years old who have experienced physical violence in the last five years                                                                                                                                      | Bad            | 7.015  | 1.468359  | 4.3  | 9.3  |
| SFTY5    | Women 16-70 years old who have suffered sexual violence                                                                                                                                                                  | Bad            | 6.165  | 1.361994  | 3.9  | 9.1  |
| SFTY6    | Women 16-70 years old who have suffered physical or sexual violence in the last five years by region and division                                                                                                        | Bad            | 4.885  | 1.227867  | 2.4  | 7.6  |

| Variable       | Description                                                                                                                                                                      | Categorisation | Mean   | Std. Dev. | Min  | Max   |
|----------------|----------------------------------------------------------------------------------------------------------------------------------------------------------------------------------|----------------|--------|-----------|------|-------|
| SFTY7          | People aged 14 and over who feel safe walking alone at night in the area where they live                                                                                         | Good           | 61.225 | 8.897361  | 49.8 | 82.6  |
| Social Welfare |                                                                                                                                                                                  |                |        |           |      |       |
| SWEL1          | People aged 14 and over who have expressed a satisfaction score for life between 8 and 10                                                                                        | Good           | 36.55  | 7.224993  | 20.6 | 54    |
| SWEL2          | People aged 14 and over who say they are very or fairly satisfied Leisure                                                                                                        | Good           | 65.24  | 5.196497  | 56.3 | 75.7  |
| SWEL3          | People aged 14 and over who feel that their situation will improve in the next five years                                                                                        | Good           | 26.455 | 3.034273  | 22.3 | 34.6  |
| SWEL4          | People aged 14 and over who feel that their situation will worsen over the next five years                                                                                       | Bad            | 18.605 | 2.487331  | 13.5 | 22.9  |
| Land Use       |                                                                                                                                                                                  |                |        |           |      |       |
| LAND1          | People aged 14 and over who feel the landscape of the place in which they live is suffering from obvious degradation                                                             | Bad            | 18.61  | 6.7765    | 7.8  | 32.6  |
| LAND2          | People aged 14 and over who declare among the 5 environmental problems for which express their concern for the landscape there is the ruin caused by excessive building activity | Bad            | 16.665 | 4.363397  | 9.4  | 24.2  |
| Environment    |                                                                                                                                                                                  |                |        |           |      |       |
| ENV1           | Municipal waste landfilled                                                                                                                                                       | Bad            | 39.83  | 28.26601  | 6.1  | 111   |
| ENV2           | People aged 14 and over believe that the extinction of plant species or animal is between 5 their concerns                                                                       | Bad            | 17.385 | 3.36816   | 12.6 | 24    |
| ENV3           | Electricity consumption covered by renewable sources                                                                                                                             | Good           | 62.24  | 72.42566  | 10.4 | 310.2 |
| ENV4           | People aged 14 and over who are very or fairly satisfied the environmental situation of the area in which they live                                                              | Good           | 74.72  | 8.568276  | 57.2 | 89.6  |

| Variable                              | Description                                                                                     | Categorisation | Mean   | Std. Dev. | Min  | Max  |
|---------------------------------------|-------------------------------------------------------------------------------------------------|----------------|--------|-----------|------|------|
| R&D                                   |                                                                                                 |                |        |           |      |      |
| RD1                                   | Employed with university education in Scientific or Technological professions                   | Good           | 14.97  | 1.622896  | 12.4 | 20   |
| RD2                                   | People of 16-74 years who have used the Internet at least once a week in the preceding 3 months | Good           | 58.95  | 6.595174  | 48.4 | 66.5 |
| Quality of Life and social conditions |                                                                                                 |                |        |           |      |      |
| Ql1                                   | Households reporting that the house is connected to the natural gas network                     | Good           | 9.35   | 7.47068   | 1.4  | 30.7 |
| Ql2                                   | Recycled municipal waste                                                                        | Good           | 43.77  | 16.16729  | 12.5 | 67.6 |
| Ql3                                   | Index of overcrowding of prisons                                                                | Bad            | 105.03 | 21.4091   | 56.8 | 138  |
| Ql4                                   | Households by great difficulty in reaching at least 3 essential services                        | Bad            | 6.835  | 2.894328  | 3.2  | 12.3 |

Source: Authors' elaboration on ISTAT (2015).

Table A2 - Rank Frequency (robustness test, k=0.25)

| Rank | PI     | VA     | LO     | TR     | VE     | FR     | LI     | ER     | TO     | UM     | MA     | LA     | AB     | MO     | CM     | PU     | BA     | CA     | SI     | SA     |
|------|--------|--------|--------|--------|--------|--------|--------|--------|--------|--------|--------|--------|--------|--------|--------|--------|--------|--------|--------|--------|
| 1    | 0      | 0      | 0      | 998815 | 0      | 166    | 0      | 341    | 678    | 0      | 0      | 0      | 0      | 0      | 0      | 0      | 0      | 0      | 0      | 0      |
| 2    | 1      | 4108   | 0      | 1002   | 2      | 445152 | 0      | 184418 | 365317 | 0      | 0      | 0      | 0      | 0      | 0      | 0      | 0      | 0      | 0      | 0      |
| 3    | 190    | 17410  | 129    | 171    | 64     | 307539 | 1      | 261237 | 413255 | 1      | 0      | 4      | 0      | 1      | 0      | 0      | 0      | 0      | 0      | 0      |
| 4    | 11131  | 68928  | 2805   | 12     | 584    | 242603 | 89     | 462256 | 211434 | 58     | 9      | 83     | 0      | 3      | 0      | 0      | 0      | 0      | 0      | 3      |
| 5    | 435991 | 293305 | 153725 | 0      | 9297   | 4424   | 5045   | 78754  | 8784   | 7382   | 651    | 2501   | 0      | 86     | 0      | 0      | 0      | 0      | 0      | 57     |
| 6    | 393362 | 204409 | 312966 | 0      | 20750  | 112    | 21629  | 11129  | 469    | 24965  | 2504   | 7068   | 3      | 293    | 0      | 0      | 0      | 0      | 0      | 340    |
| 7    | 136168 | 218117 | 409982 | 0      | 53052  | 4      | 75953  | 1672   | 57     | 67130  | 9556   | 25305  | 7      | 1061   | 0      | 0      | 0      | 0      | 0      | 1937   |
| 8    | 21202  | 92997  | 90856  | 0      | 198641 | 0      | 282672 | 185    | 6      | 181407 | 39316  | 73612  | 68     | 3858   | 0      | 0      | 1      | 0      | 0      | 15178  |
| 9    | 1626   | 48897  | 21816  | 0      | 137070 | 0      | 243843 | 8      | 0      | 261397 | 109332 | 137741 | 332    | 10556  | 0      | 0      | 2      | 1      | 0      | 27379  |
| 10   | 296    | 30792  | 6292   | 0      | 130486 | 0      | 176477 | 0      | 0      | 235060 | 190695 | 163269 | 1736   | 23101  | 0      | 0      | 8      | 8      | 0      | 41781  |
| 11   | 30     | 14480  | 1192   | 0      | 146759 | 0      | 129479 | 0      | 0      | 144362 | 254416 | 178354 | 8370   | 50893  | 0      | 0      | 30     | 13     | 0      | 71621  |
| 12   | 3      | 5601   | 206    | 0      | 133506 | 0      | 49066  | 0      | 0      | 58667  | 240715 | 231382 | 32046  | 108336 | 0      | 0      | 105    | 46     | 0      | 140321 |
| 13   | 0      | 784    | 29     | 0      | 80402  | 0      | 13395  | 0      | 0      | 17196  | 108877 | 119802 | 129500 | 233520 | 0      | 0      | 550    | 174    | 0      | 295772 |
| 14   | 0      | 158    | 2      | 0      | 51442  | 0      | 2109   | 0      | 0      | 2281   | 36081  | 49578  | 295192 | 330359 | 0      | 0      | 3897   | 1040   | 0      | 227859 |
| 15   | 0      | 14     | 0      | 0      | 33640  | 0      | 230    | 0      | 0      | 88     | 7734   | 10836  | 500080 | 233752 | 0      | 0      | 35021  | 5925   | 0      | 172680 |
| 16   | 0      | 0      | 0      | 0      | 3139   | 0      | 11     | 0      | 0      | 6      | 107    | 441    | 28293  | 3850   | 8      | 18     | 862737 | 96525  | 3      | 4862   |
| 17   | 0      | 0      | 0      | 0      | 1150   | 0      | 1      | 0      | 0      | 0      | 7      | 24     | 4372   | 331    | 1527   | 6393   | 97577  | 888164 | 244    | 210    |
| 18   | 0      | 0      | 0      | 0      | 12     | 0      | 0      | 0      | 0      | 0      | 0      | 0      | 1      | 0      | 226384 | 673688 | 69     | 7717   | 92129  | 0      |
| 19   | 0      | 0      | 0      | 0      | 3      | 0      | 0      | 0      | 0      | 0      | 0      | 0      | 0      | 0      | 555747 | 235253 | 3      | 367    | 208629 | 0      |
| 20   | 0      | 0      | 0      | 0      | 1      | 0      | 0      | 0      | 0      | 0      | 0      | 0      | 0      | 0      | 216334 | 84648  | 0      | 20     | 698995 | 0      |

Source: Authors' elaboration on ISTAT (2015).

Table A3 - Pairwise Comparison Index (robustness test, k=0.25)

|    | PI    | VA    | LO    | TR    | VE    | FR    | LI    | ER    | TO    | UM    | MA    | LA    | AB    | MO    | CM    | PU    | BA    | CA    | SI    | SA    | APCI  |
|----|-------|-------|-------|-------|-------|-------|-------|-------|-------|-------|-------|-------|-------|-------|-------|-------|-------|-------|-------|-------|-------|
| PI | 1.000 | 0.577 | 0.743 | 0.000 | 0.967 | 0.001 | 0.989 | 0.019 | 0.001 | 0.986 | 0.997 | 0.995 | 1.000 | 1.000 | 1.000 | 1.000 | 1.000 | 1.000 | 1.000 | 1.000 | 0.764 |
| VA | 0.423 | 1.000 | 0.574 | 0.000 | 0.932 | 0.010 | 0.885 | 0.086 | 0.022 | 0.884 | 0.969 | 0.933 | 0.999 | 0.997 | 1.000 | 1.000 | 1.000 | 1.000 | 1.000 | 0.999 | 0.736 |
| LO | 0.257 | 0.426 | 1.000 | 0.000 | 0.950 | 0.000 | 0.936 | 0.005 | 0.001 | 0.934 | 0.983 | 0.983 | 1.000 | 0.997 | 1.000 | 1.000 | 1.000 | 1.000 | 1.000 | 0.997 | 0.723 |
| TR | 1.000 | 1.000 | 1.000 | 1.000 | 1.000 | 1.000 | 1.000 | 1.000 | 0.999 | 1.000 | 1.000 | 1.000 | 1.000 | 1.000 | 1.000 | 1.000 | 1.000 | 1.000 | 1.000 | 1.000 | 1.000 |
| VE | 0.033 | 0.068 | 0.050 | 0.000 | 1.000 | 0.000 | 0.384 | 0.001 | 0.000 | 0.413 | 0.622 | 0.581 | 0.934 | 0.858 | 1.000 | 1.000 | 0.996 | 0.998 | 1.000 | 0.833 | 0.539 |
| FR | 0.999 | 0.990 | 1.000 | 0.000 | 1.000 | 1.000 | 1.000 | 0.679 | 0.526 | 1.000 | 1.000 | 1.000 | 1.000 | 1.000 | 1.000 | 1.000 | 1.000 | 1.000 | 1.000 | 1.000 | 0.910 |
| LI | 0.011 | 0.115 | 0.064 | 0.000 | 0.616 | 0.000 | 1.000 | 0.000 | 0.000 | 0.559 | 0.789 | 0.808 | 0.998 | 0.976 | 1.000 | 1.000 | 1.000 | 1.000 | 1.000 | 0.934 | 0.594 |
| ER | 0.981 | 0.914 | 0.995 | 0.000 | 0.999 | 0.321 | 1.000 | 1.000 | 0.314 | 1.000 | 1.000 | 1.000 | 1.000 | 1.000 | 1.000 | 1.000 | 1.000 | 1.000 | 1.000 | 1.000 | 0.876 |
| TO | 0.999 | 0.978 | 0.999 | 0.001 | 1.000 | 0.474 | 1.000 | 0.686 | 1.000 | 1.000 | 1.000 | 1.000 | 1.000 | 1.000 | 1.000 | 1.000 | 1.000 | 1.000 | 1.000 | 1.000 | 0.907 |
| UM | 0.014 | 0.116 | 0.066 | 0.000 | 0.587 | 0.000 | 0.441 | 0.000 | 0.000 | 1.000 | 0.809 | 0.720 | 0.999 | 0.972 | 1.000 | 1.000 | 1.000 | 1.000 | 1.000 | 0.917 | 0.582 |
| MA | 0.003 | 0.031 | 0.017 | 0.000 | 0.378 | 0.000 | 0.211 | 0.000 | 0.000 | 0.191 | 1.000 | 0.486 | 0.968 | 0.882 | 1.000 | 1.000 | 1.000 | 1.000 | 1.000 | 0.817 | 0.499 |
| LA | 0.005 | 0.067 | 0.017 | 0.000 | 0.419 | 0.000 | 0.192 | 0.000 | 0.000 | 0.280 | 0.514 | 1.000 | 0.969 | 0.871 | 1.000 | 1.000 | 0.999 | 1.000 | 1.000 | 0.814 | 0.507 |
| AB | 0.000 | 0.001 | 0.000 | 0.000 | 0.066 | 0.000 | 0.002 | 0.000 | 0.000 | 0.001 | 0.032 | 0.031 | 1.000 | 0.311 | 1.000 | 1.000 | 0.969 | 0.992 | 1.000 | 0.253 | 0.333 |
| MO | 0.000 | 0.003 | 0.003 | 0.000 | 0.142 | 0.000 | 0.024 | 0.000 | 0.000 | 0.028 | 0.118 | 0.129 | 0.689 | 1.000 | 1.000 | 1.000 | 0.995 | 0.999 | 1.000 | 0.410 | 0.377 |
| CM | 0.000 | 0.000 | 0.000 | 0.000 | 0.000 | 0.000 | 0.000 | 0.000 | 0.000 | 0.000 | 0.000 | 0.000 | 0.000 | 0.000 | 1.000 | 0.266 | 0.000 | 0.002 | 0.745 | 0.000 | 0.101 |
| PU | 0.000 | 0.000 | 0.000 | 0.000 | 0.000 | 0.000 | 0.000 | 0.000 | 0.000 | 0.000 | 0.000 | 0.000 | 0.000 | 0.000 | 0.734 | 1.000 | 0.000 | 0.007 | 0.862 | 0.000 | 0.130 |
| BA | 0.000 | 0.000 | 0.000 | 0.000 | 0.004 | 0.000 | 0.000 | 0.000 | 0.000 | 0.000 | 0.000 | 0.001 | 0.031 | 0.005 | 1.000 | 1.000 | 1.000 | 0.900 | 1.000 | 0.006 | 0.247 |
| CA | 0.000 | 0.000 | 0.000 | 0.000 | 0.002 | 0.000 | 0.000 | 0.000 | 0.000 | 0.000 | 0.000 | 0.000 | 0.008 | 0.001 | 0.998 | 0.993 | 0.100 | 1.000 | 1.000 | 0.001 | 0.205 |
| SI | 0.000 | 0.000 | 0.000 | 0.000 | 0.000 | 0.000 | 0.000 | 0.000 | 0.000 | 0.000 | 0.000 | 0.000 | 0.000 | 0.000 | 0.255 | 0.138 | 0.000 | 0.000 | 1.000 | 0.000 | 0.070 |
| SA | 0.000 | 0.001 | 0.003 | 0.000 | 0.167 | 0.000 | 0.066 | 0.000 | 0.000 | 0.083 | 0.183 | 0.186 | 0.747 | 0.590 | 1.000 | 1.000 | 0.994 | 0.999 | 1.000 | 1.000 | 0.401 |

Source: Authors' elaboration on ISTAT (2015).



Table A4 – Intraclass correlation coefficients

|                     | Rank    |         |         |         |         |         |         |         |         |         |         |         |         |         |         |         |         |         |         |         |
|---------------------|---------|---------|---------|---------|---------|---------|---------|---------|---------|---------|---------|---------|---------|---------|---------|---------|---------|---------|---------|---------|
|                     | 1       | 2       | 3       | 4       | 5       | 6       | 7       | 8       | 9       | 10      | 11      | 12      | 13      | 14      | 15      | 16      | 17      | 18      | 19      | 20      |
| individual          | 1.00    | 0.99    | 0.98    | 0.88    | 0.92    | 0.94    | 0.89    | 0.91    | 0.94    | 0.94    | 0.90    | 0.84    | 0.91    | 0.79    | 0.62    | 0.70    | 0.67    | 0.80    | 0.77    | 0.65    |
| Average             | 1.00    | 1.00    | 0.99    | 0.97    | 0.98    | 0.98    | 0.97    | 0.97    | 0.98    | 0.98    | 0.97    | 0.96    | 0.97    | 0.94    | 0.87    | 0.90    | 0.89    | 0.94    | 0.93    | 0.88    |
| F- test<br>(19, 19) | 803.94  | 354.44  | 196.93  | 29.82   | 45.34   | 58.79   | 32.39   | 39.81   | 61.10   | 63.29   | 36.18   | 22.47   | 39.28   | 16.46   | 7.56    | 10.13   | 9.19    | 16.73   | 14.53   | 8.37    |
| p-value             | (0.000) | (0.000) | (0.000) | (0.000) | (0.000) | (0.000) | (0.000) | (0.000) | (0.000) | (0.000) | (0.000) | (0.000) | (0.000) | (0.000) | (0.000) | (0.000) | (0.000) | (0.000) | (0.000) | (0.000) |

Source: authors' elaboration on data from ISTAT (2015)

Table A5 - Regions abbreviations and macro-areas composition

|                       |  |    |
|-----------------------|--|----|
| Nord-West             |  |    |
| Piedmont              |  | PI |
| Aosta Valley          |  | VA |
| Liguria               |  | LI |
| Lombardy              |  | LO |
| Nord-East             |  |    |
| South Tyrol -Trentino |  | TR |
| Veneto                |  | VE |
| Friuli-Venezia Giulia |  | FR |
| Emilia-Romagna        |  | ER |
| Centre                |  |    |
| Tuscany               |  | TO |
| Umbria                |  | UM |
| Marche                |  | MA |
| Lazio                 |  | LA |
| South                 |  |    |
| Abruzzi               |  | AB |
| Molise                |  | MO |
| Campania              |  | CM |
| Apuglia               |  | PU |
| Basilicata            |  | BA |
| Calabria              |  | CL |
| Islands               |  |    |
| Sicily                |  | SI |
| Sardinia              |  | SA |

Table A6 – Disparities in social, economic, and environmental indicators

| Disparities in Social, economic, and environmental indicators |      |      |           |      |      |                    |      |      |                  |      |      |
|---------------------------------------------------------------|------|------|-----------|------|------|--------------------|------|------|------------------|------|------|
| Health                                                        |      |      | Education |      |      | Working Conditions |      |      | Economic Welfare |      |      |
| Variable                                                      | Gini | EGR  | Variable  | Gini | EGR  | Variable           | Gini | EGR  | Variable         | Gini | EGR  |
| Health1                                                       | 0.06 | 0.03 | Edu1      | 0.06 | 0.03 | Work1              | 0.10 | 0.05 | Econw1           | 0.10 | 0.06 |
| Health2                                                       | 0.05 | 0.02 | Edu2      | 0.09 | 0.05 | Work2              | 0.26 | 0.15 | Econw2           | 0.13 | 0.06 |
| Health3                                                       | 0.12 | 0.06 | Edu3      | 0.16 | 0.08 | Work3              | 0.19 | 0.09 | Econw3           | 0.29 | 0.15 |
| Health4                                                       | 0.17 | 0.08 | Edu4      | 0.17 | 0.08 | Work4              | 0.22 | 0.11 | Econw4           | 0.29 | 0.14 |
| Health5                                                       | 0.16 | 0.07 | Edu5      | 0.11 | 0.05 | Work5              | 0.07 | 0.03 | Econw5           | 0.16 | 0.07 |
|                                                               |      |      | Edu6      | 0.16 | 0.08 | Work6              | 0.04 | 0.02 | Econw6           | 0.29 | 0.15 |
|                                                               |      |      |           |      |      | Work7              | 0.02 | 0.01 | Econw7           | 0.28 | 0.13 |
|                                                               |      |      |           |      |      | Work8              | 0.13 | 0.06 |                  |      |      |
|                                                               |      |      |           |      |      | Work9              | 0.12 | 0.05 |                  |      |      |
| Social Capital                                                |      |      | Politics  |      |      | Safety             |      |      | Social Welfare   |      |      |
| Variable                                                      | Gini | EGR  | Variable  | Gini | EGR  | Variable           | Gini | EGR  | Variable         | Gini | EGR  |
| Soc1                                                          | 0.10 | 0.04 | Pol1      | 0.09 | 0.04 | Sfty1              | 0.22 | 0.11 | Swel1            | 0.10 | 0.05 |
| Soc2                                                          | 0.10 | 0.05 | Pol2      | 0.05 | 0.02 | Sfty2              | 0.38 | 0.19 | Swel2            | 0.04 | 0.02 |
| Soc3                                                          | 0.02 | 0.01 | Pol3      | 0.04 | 0.02 | Sfty3              | 0.39 | 0.18 | Swel3            | 0.06 | 0.03 |
| Soc4                                                          | 0.12 | 0.05 | Pol4      | 0.05 | 0.02 | Sfty4              | 0.12 | 0.05 | Swel4            | 0.07 | 0.03 |
| Soc5                                                          | 0.06 | 0.03 | Pol5      | 0.07 | 0.03 | Sfty5              | 0.12 | 0.06 |                  |      |      |
| Soc6                                                          | 0.19 | 0.08 | Pol6      | 0.02 | 0.01 | Sfty6              | 0.13 | 0.07 |                  |      |      |
| Soc7                                                          | 0.21 | 0.10 | Pol7      | 0.02 | 0.01 | Sfty7              | 0.08 | 0.04 |                  |      |      |
| Soc8                                                          | 0.11 | 0.05 |           |      |      |                    |      |      |                  |      |      |

Source: Authors' elaboration on ISTAT (2015)

Table A6 – Disparities in Social, economic, and environmental indicators (cont.)

| Disparities in Social, economic, and environmental indicators (cont.) |      |      |             |      |      |          |      |      |                                       |      |      |
|-----------------------------------------------------------------------|------|------|-------------|------|------|----------|------|------|---------------------------------------|------|------|
| Land Use                                                              |      |      | Environment |      |      | R&D      |      |      | Quality of Life and SOC8al conditions |      |      |
| Variable                                                              | Gini | EGR  | Variable    | Gini | EGR  | Variable | Gini | EGR  | Variable                              | Gini | EGR  |
| Land1                                                                 | 0.20 | 0.10 | Env1        | 0.38 | 0.18 | Rd1      | 0.05 | 0.02 | Ql1                                   | 0.39 | 0.21 |
| Land2                                                                 | 0.15 | 0.07 | Env2        | 0.11 | 0.05 | Rd2      | 0.06 | 0.03 | Ql2                                   | 0.20 | 0.10 |
|                                                                       |      |      | Env3        | 0.47 | 0.23 |          |      |      | Ql3                                   | 0.11 | 0.05 |
|                                                                       |      |      | Env4        | 0.06 | 0.03 |          |      |      | Ql4                                   | 0.22 | 0.12 |

Source: Authors' elaboration on ISTAT (2015)

Table A7 – Social, economic and environmental performance index (SEEPI)

| Region                 | Aritmetic mean<br>on original<br>values<br>normalized on<br>the interval<br>[min,max] |      | Geometric mean<br>of z values<br>normalized on<br>the interval<br>[M-3 $\sigma$ , M+3 $\sigma$ ] | Rank |
|------------------------|---------------------------------------------------------------------------------------|------|--------------------------------------------------------------------------------------------------|------|
|                        |                                                                                       | Rank |                                                                                                  |      |
| Piedmont               | 0.528                                                                                 | 7    | 0.515                                                                                            | 5    |
| Valle d'Aosta          | 0.552                                                                                 | 5    | 0.513                                                                                            | 6    |
| Lombardy               | 0.530                                                                                 | 6    | 0.510                                                                                            | 7    |
| South Tyrol - Trentino | 0.644                                                                                 | 1    | 0.597                                                                                            | 1    |
| Veneto                 | 0.525                                                                                 | 8    | 0.486                                                                                            | 10   |
| Friuli-Venezia Giulia  | 0.566                                                                                 | 2    | 0.545                                                                                            | 2    |
| Liguria                | 0.508                                                                                 | 9    | 0.491                                                                                            | 8    |
| Emilia-Romagna         | 0.560                                                                                 | 3    | 0.538                                                                                            | 4    |
| Tuscany                | 0.557                                                                                 | 4    | 0.544                                                                                            | 3    |
| Umbria                 | 0.507                                                                                 | 10   | 0.489                                                                                            | 9    |
| Marche                 | 0.500                                                                                 | 12   | 0.479                                                                                            | 12   |
| Lazio                  | 0.504                                                                                 | 11   | 0.480                                                                                            | 11   |
| Abruzzo                | 0.468                                                                                 | 15   | 0.451                                                                                            | 15   |
| Molise                 | 0.475                                                                                 | 14   | 0.459                                                                                            | 14   |
| Campania               | 0.398                                                                                 | 20   | 0.357                                                                                            | 19   |
| Apulia                 | 0.400                                                                                 | 18   | 0,367                                                                                            | 18   |
| Basilicata             | 0.445                                                                                 | 17   | 0.421                                                                                            | 16   |
| Calabria               | 0.446                                                                                 | 16   | 0.404                                                                                            | 17   |
| Sicily                 | 0.486                                                                                 | 13   | 0.349                                                                                            | 20   |
| Sardinia               | 0.400                                                                                 | 19   | 0.463                                                                                            | 13   |

Source: authors' elaboration on ISTAT (2015)

Table A8 – Criteria with the five greatest average weights in the set of vector of weights assigning to the corresponding region the best position

|                       |         |         |         |         |        |
|-----------------------|---------|---------|---------|---------|--------|
|                       | HEALTH1 | POL5    | WORK4   | SFTY2   | LAND2  |
| Abruzzo               | 0.03    | 0.03    | 0.029   | 0.029   | 0.029  |
|                       | WORK3   | SQ3     | WORK8   | SOC7    | WORK5  |
| Basilicata            | 0.033   | 0.032   | 0.031   | 0.031   | 0.03   |
|                       | WORK8   | SFTY6   | SFTY2   | WORK2   | LAND2  |
| Calabria              | 0.031   | 0.031   | 0.03    | 0.027   | 0.026  |
|                       | POL4    | LAND2   | SQ1     | WORK5   | SQ2    |
| Campania              | 0.034   | 0.033   | 0.033   | 0.032   | 0.032  |
|                       | WORK8   | HEALTH3 | HEALTH1 | POL1    | POL7   |
| Emilia-Romagna        | 0.027   | 0.026   | 0.024   | 0.023   | 0.023  |
|                       | WORK8   | WORK6   | SFTY3   | HEALTH3 | SFTY6  |
| Friuli-Venezia Giulia | 0.027   | 0.026   | 0.024   | 0.023   | 0.023  |
|                       | ECONW3  | HEALTH3 | POL3    | SFTY1   | SOC3   |
| Lazio                 | 0.03    | 0.029   | 0.029   | 0.028   | 0.027  |
|                       | EDU2    | SFTY1   | HEALTH2 | POL3    | RD2    |
| Liguria               | 0.026   | 0.026   | 0.024   | 0.024   | 0.024  |
|                       | SFTY1   | ECONW7  | SWEL2   | SWEL4   | SQ1    |
| Lombardy              | 0.035   | 0.034   | 0.034   | 0.034   | 0.034  |
|                       | SFTY6   | SFTY1   | RD1     | HEALTH3 | LAND1  |
| Marche                | 0.035   | 0.034   | 0.033   | 0.032   | 0.032  |
|                       | POL1    | LAND2   | HEALTH3 | SFTY5   | WORK2  |
| Molise                | 0.038   | 0.037   | 0.035   | 0.033   | 0.032  |
|                       | SFTY4   | POL7    | SFTY1   | HEALTH5 | ECONW5 |
| Piedmont              | 0.029   | 0.026   | 0.026   | 0.025   | 0.024  |
|                       | POL5    | WORK5   | SQ2     | POL7    | POL3   |
| Apuglia               | 0.031   | 0.03    | 0.028   | 0.027   | 0.026  |
|                       | SFTY1   | EDU3    | ECONW3  | SWEL3   | SQ1    |
| Sardinia              | 0.024   | 0.023   | 0.023   | 0.023   | 0.023  |

|                                    |         |         |         |         |         |
|------------------------------------|---------|---------|---------|---------|---------|
|                                    | WORK4   | ECONW5  | LAND1   | HEALTH5 | POL6    |
| Sicily                             | 0.026   | 0.026   | 0.024   | 0.022   | 0.022   |
|                                    | HEALTH3 | WORK6   | POL2    | WORK8   | ENV2    |
| Tuscany                            | 0.026   | 0.024   | 0.024   | 0.023   | 0.023   |
|                                    | HEALTH1 | HEALTH2 | HEALTH3 | HEALTH4 | HEALTH5 |
| South Tyrol -<br>Trentino/Südtirol | 0.015   | 0.015   | 0.015   | 0.015   | 0.015   |
|                                    | SFTY1   | WORK6   | ECONW3  | HEALTH5 | SQ1     |
| Umbria                             | 0.03    | 0.027   | 0.026   | 0.024   | 0.024   |
|                                    | ENV3    | SQ3     | WORK5   | SFTY7   | SFTY1   |
| Aosta Valley                       | 0.023   | 0.022   | 0.021   | 0.021   | 0.02    |
|                                    | HEALTH2 | HEALTH5 | POL7    | SWEL3   | RD1     |
| Veneto                             | 0.035   | 0.034   | 0.034   | 0.034   | 0.034   |

Source: Authors' elaboration on data from ISTAT (2015)

Table A9 – Criteria with the five greatest average weights in the set of vector of weights assigning to the corresponding region the worst position

|                       |         |         |         |         |         |
|-----------------------|---------|---------|---------|---------|---------|
|                       | SFTY6   | SFTY5   | SFTY4   | HEALTH2 | SOC3    |
| Abruzzo               | 0.025   | 0.024   | 0.023   | 0.02    | 0.02    |
|                       | POL6    | POL7    | HEALTH5 | POL4    | HEALTH3 |
| Basilicata            | 0.026   | 0.026   | 0.025   | 0.025   | 0.024   |
|                       | EDU6    | WORK4   | POL5    | ENV2    | HEALTH4 |
| Calabria              | 0.032   | 0.03    | 0.029   | 0.028   | 0.025   |
|                       | SFTY5   | HEALTH2 | ECONW7  | SOC1    | SOC2    |
| Campania              | 0.018   | 0.017   | 0.017   | 0.017   | 0.017   |
|                       | SFTY1   | SFTY4   | SFTY6   | WORK6   | ECONW5  |
| Emilia-Romagna        | 0.031   | 0.027   | 0.025   | 0.022   | 0.021   |
|                       | WORK3   | ECONW3  | SOC5    | SQ3     | POL3    |
| Friuli-Venezia Giulia | 0.031   | 0.031   | 0.03    | 0.03    | 0.029   |
|                       | SFTY2   | HEALTH2 | WORK8   | SFTY4   | SFTY7   |
| Lazio                 | 0.029   | 0.025   | 0.025   | 0.025   | 0.025   |
|                       | SWEL4   | HEALTH1 | LAND2   | SFTY2   | SWEL3   |
| Liguria               | 0.031   | 0.027   | 0.027   | 0.026   | 0.025   |
|                       | WORK3   | LAND2   | WORK8   | WORK6   | SFTY7   |
| Lombardy              | 0.027   | 0.027   | 0.025   | 0.024   | 0.024   |
|                       | SOC1    | SWEL4   | LAND2   | WORK9   | POL4    |
| Marche                | 0.032   | 0.032   | 0.032   | 0.031   | 0.031   |
|                       | ENV1    | SFTY6   | WORK6   | SFTY4   | WORK8   |
| Molise                | 0.029   | 0.026   | 0.025   | 0.023   | 0.021   |
|                       | ENV2    | HEALTH1 | EDU2    | ENV3    | RD2     |
| Piedmont              | 0.031   | 0.028   | 0.028   | 0.026   | 0.026   |
|                       | SFTY3   | SOC3    | HEALTH5 | SQ3     | SQ4     |
| Apuglia               | 0.023   | 0.019   | 0.018   | 0.018   | 0.017   |
|                       | HEALTH1 | EDU1    | EDU2    | WORK3   | ECONW7  |



|                                    |         |        |        |         |         |
|------------------------------------|---------|--------|--------|---------|---------|
| Sardinia                           | 0.022   | 0.022  | 0.022  | 0.022   | 0.022   |
|                                    | ECONW2  | WORK9  | ECONW4 | ENV1    | SQ2     |
| Sicily                             | 0.018   | 0.016  | 0.016  | 0.016   | 0.016   |
|                                    | SFTY4   | LAND1  | WORK7  | SOC5    | POL7    |
| Tuscany                            | 0.032   | 0.03   | 0.029  | 0.027   | 0.027   |
|                                    | HEALTH3 | WORK8  | WORK6  | HEALTH5 | POL2    |
| South Tyrol -<br>Trentino/Südtirol | 0.03    | 0.03   | 0.029  | 0.025   | 0.025   |
|                                    | WORK5   | ECONW3 | SFTY1  | ENV3    | HEALTH2 |
| Umbria                             | 0.03    | 0.025  | 0.025  | 0.025   | 0.024   |
|                                    | POL7    | LAND2  | SQ1    | HEALTH3 | ECONW3  |
| Aosta Valley                       | 0.03    | 0.03   | 0.027  | 0.026   | 0.026   |
|                                    | SFTY1   | WORK2  | SFTY2  | HEALTH3 | POL2    |
| Veneto                             | 0.037   | 0.036  | 0.036  | 0.035   | 0.035   |

Source: Authors' elaboration on data from ISTAT (2015)

Table A10 – Cumulated Rank Acceptability Index

|    | Rank  |       |       |       |       |       |       |       |       |       |       |       |       |       |       |       |       |       |       |       |
|----|-------|-------|-------|-------|-------|-------|-------|-------|-------|-------|-------|-------|-------|-------|-------|-------|-------|-------|-------|-------|
|    | 1     | 2     | 3     | 4     | 5     | 6     | 7     | 8     | 9     | 10    | 11    | 12    | 13    | 14    | 15    | 16    | 17    | 18    | 19    | 20    |
| PI | 0.000 | 0.000 | 0.000 | 0.002 | 0.462 | 0.880 | 0.986 | 1.000 | 1.000 | 1.000 | 1.000 | 1.000 | 1.000 | 1.000 | 1.000 | 1.000 | 1.000 | 1.000 | 1.000 | 1.000 |
| VA | 0.000 | 0.003 | 0.017 | 0.077 | 0.394 | 0.592 | 0.823 | 0.911 | 0.955 | 0.983 | 0.995 | 0.999 | 1.000 | 1.000 | 1.000 | 1.000 | 1.000 | 1.000 | 1.000 | 1.000 |
| LO | 0.000 | 0.000 | 0.000 | 0.001 | 0.131 | 0.452 | 0.909 | 0.982 | 0.996 | 0.999 | 1.000 | 1.000 | 1.000 | 1.000 | 1.000 | 1.000 | 1.000 | 1.000 | 1.000 | 1.000 |
| TR | 1.000 | 1.000 | 1.000 | 1.000 | 1.000 | 1.000 | 1.000 | 1.000 | 1.000 | 1.000 | 1.000 | 1.000 | 1.000 | 1.000 | 1.000 | 1.000 | 1.000 | 1.000 | 1.000 | 1.000 |
| VE | 0.000 | 0.000 | 0.000 | 0.000 | 0.008 | 0.024 | 0.070 | 0.295 | 0.436 | 0.571 | 0.734 | 0.875 | 0.948 | 0.985 | 0.999 | 1.000 | 1.000 | 1.000 | 1.000 | 1.000 |
| FR | 0.000 | 0.456 | 0.759 | 0.998 | 1.000 | 1.000 | 1.000 | 1.000 | 1.000 | 1.000 | 1.000 | 1.000 | 1.000 | 1.000 | 1.000 | 1.000 | 1.000 | 1.000 | 1.000 | 1.000 |
| LI | 0.000 | 0.000 | 0.000 | 0.000 | 0.003 | 0.019 | 0.084 | 0.387 | 0.640 | 0.815 | 0.946 | 0.989 | 0.999 | 1.000 | 1.000 | 1.000 | 1.000 | 1.000 | 1.000 | 1.000 |
| ER | 0.000 | 0.176 | 0.425 | 0.926 | 0.996 | 1.000 | 1.000 | 1.000 | 1.000 | 1.000 | 1.000 | 1.000 | 1.000 | 1.000 | 1.000 | 1.000 | 1.000 | 1.000 | 1.000 | 1.000 |
| TO | 0.000 | 0.365 | 0.799 | 0.995 | 1.000 | 1.000 | 1.000 | 1.000 | 1.000 | 1.000 | 1.000 | 1.000 | 1.000 | 1.000 | 1.000 | 1.000 | 1.000 | 1.000 | 1.000 | 1.000 |
| UM | 0.000 | 0.000 | 0.000 | 0.000 | 0.005 | 0.026 | 0.087 | 0.270 | 0.547 | 0.795 | 0.938 | 0.987 | 0.999 | 1.000 | 1.000 | 1.000 | 1.000 | 1.000 | 1.000 | 1.000 |
| MA | 0.000 | 0.000 | 0.000 | 0.000 | 0.000 | 0.002 | 0.008 | 0.038 | 0.137 | 0.326 | 0.589 | 0.852 | 0.962 | 0.994 | 1.000 | 1.000 | 1.000 | 1.000 | 1.000 | 1.000 |
| LA | 0.000 | 0.000 | 0.000 | 0.000 | 0.002 | 0.007 | 0.030 | 0.098 | 0.236 | 0.400 | 0.575 | 0.828 | 0.949 | 0.993 | 1.000 | 1.000 | 1.000 | 1.000 | 1.000 | 1.000 |
| AB | 0.000 | 0.000 | 0.000 | 0.000 | 0.000 | 0.000 | 0.000 | 0.000 | 0.000 | 0.001 | 0.006 | 0.027 | 0.143 | 0.434 | 0.975 | 0.997 | 1.000 | 1.000 | 1.000 | 1.000 |
| MO | 0.000 | 0.000 | 0.000 | 0.000 | 0.000 | 0.000 | 0.001 | 0.004 | 0.012 | 0.032 | 0.077 | 0.172 | 0.411 | 0.770 | 0.999 | 1.000 | 1.000 | 1.000 | 1.000 | 1.000 |
| CM | 0.000 | 0.000 | 0.000 | 0.000 | 0.000 | 0.000 | 0.000 | 0.000 | 0.000 | 0.000 | 0.000 | 0.000 | 0.000 | 0.000 | 0.000 | 0.000 | 0.001 | 0.194 | 0.747 | 1.000 |
| PU | 0.000 | 0.000 | 0.000 | 0.000 | 0.000 | 0.000 | 0.000 | 0.000 | 0.000 | 0.000 | 0.000 | 0.000 | 0.000 | 0.000 | 0.000 | 0.000 | 0.003 | 0.710 | 0.918 | 1.000 |
| BA | 0.000 | 0.000 | 0.000 | 0.000 | 0.000 | 0.000 | 0.000 | 0.000 | 0.000 | 0.000 | 0.000 | 0.000 | 0.000 | 0.002 | 0.026 | 0.922 | 1.000 | 1.000 | 1.000 | 1.000 |
| CA | 0.000 | 0.000 | 0.000 | 0.000 | 0.000 | 0.000 | 0.000 | 0.000 | 0.000 | 0.000 | 0.000 | 0.000 | 0.000 | 0.001 | 0.005 | 0.082 | 0.997 | 1.000 | 1.000 | 1.000 |
| SI | 0.000 | 0.000 | 0.000 | 0.000 | 0.000 | 0.000 | 0.000 | 0.000 | 0.000 | 0.000 | 0.000 | 0.000 | 0.000 | 0.000 | 0.000 | 0.000 | 0.000 | 0.096 | 0.335 | 1.000 |
| SA | 0.000 | 0.000 | 0.000 | 0.000 | 0.000 | 0.000 | 0.002 | 0.016 | 0.041 | 0.077 | 0.141 | 0.269 | 0.587 | 0.820 | 0.997 | 1.000 | 1.000 | 1.000 | 1.000 | 1.000 |

Source: Authors' elaboration on ISTAT (2015).
